# Supplementary figures and images for: Association of NCOA6 Gene Polymorphism with Milk Production Traits in Chinese Holstein Cows
Source: MDPI journal article supplement (doi:10.3390/ani15101461), 2025-05-19

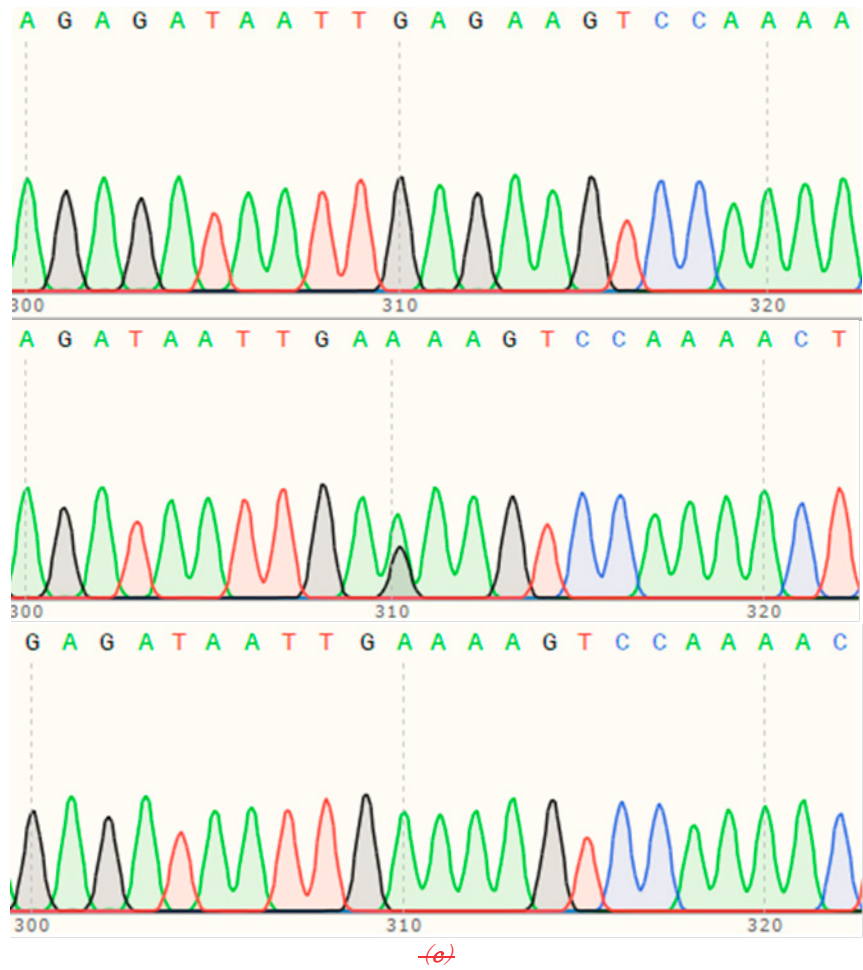

**Figure 1S.** Nuclear receptor coactivator 6 gene with the localization of one identified SNPs (NCOA6).

Supplement: s1 [file animals-3608549-supplementary.pdf › animals-3608549-supplementary.pdf]
